# Supplementary material
Source: publisher figshare collection journal article supplement (https://acs.figshare.com/ndownloader/files/4159702)
Supplement: Supplementary file 1 [file 4159702]

## **SUPPORTING INFORMATION**

### **On-Target Labeling of Intracellular Metabolites Combined with Chemical Mapping of Individual Hyphae Revealing Cytoplasmic Relocation of Isotopologues**

Jie-Bi Hu, Yu-Chie Chen,\* and Pawel L. Urban\*

Department of Applied Chemistry, National Chiao Tung University  
1001 University Rd, Hsinchu, 300, Taiwan

\* Corresponding authors; fax +886-3-5723764.

## ADDITIONAL FIGURE

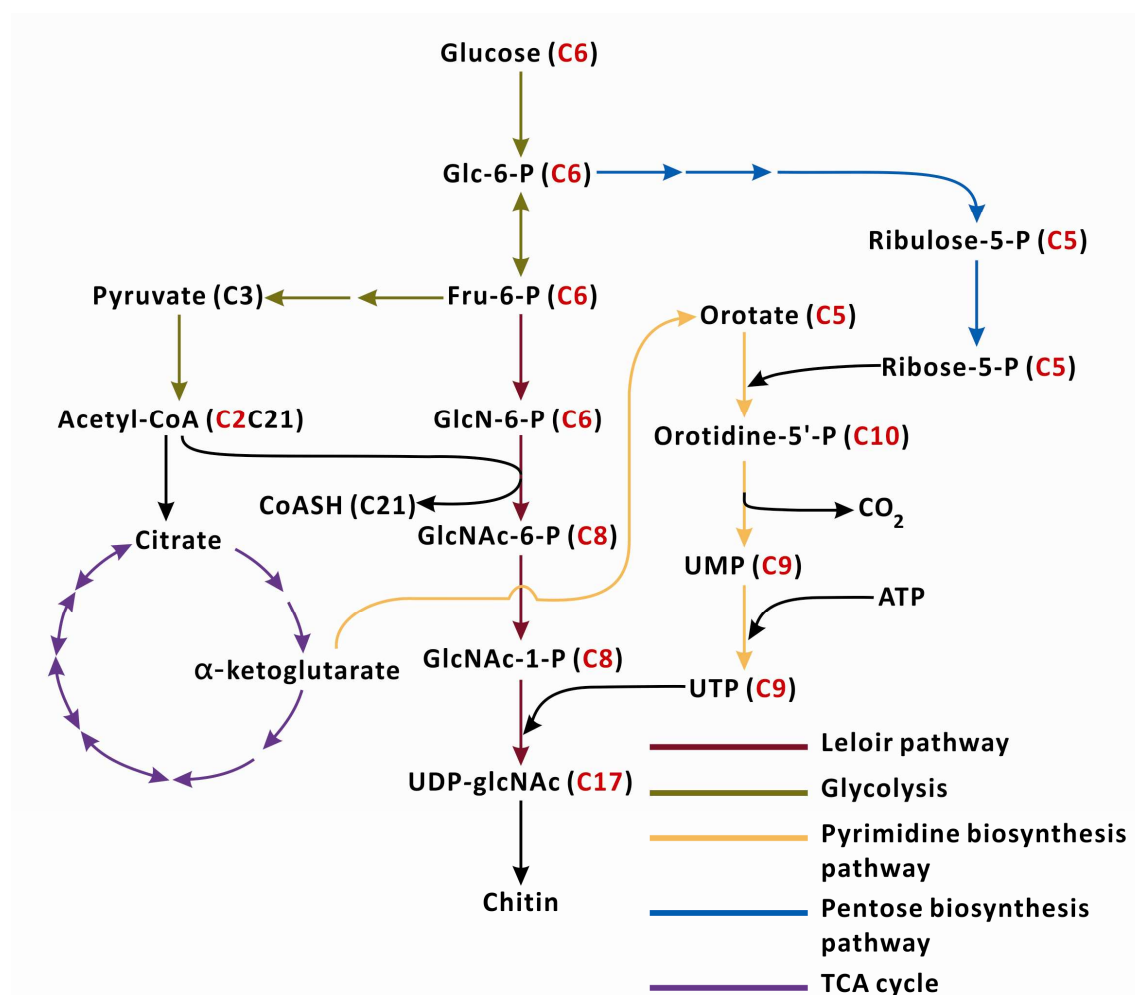

**Figure S1.** Biochemical pathways involved in the bio-labeling of UDP-GlcNAc in *N. crassa*. The model has been based on the canonical pathways: Leloir pathway, glycolysis, pyrimidine biosynthesis pathway, pentose biosynthesis pathway, and TCA cycle. Multiple arrows signify that several reactions are involved in the biotransformation of a given metabolite. (We have used the following review articles as references: (a) Radford, A. *Adv. Genet.* **2004**, 52, 165-207; (b) Milewski, S.; Gabriel, I.; Olchow, J. *Yeast* **2006**, 23, 1-14.) Based on this model, one should expect that the incorporation of  $^{13}\text{C}$  into the glucose and acyl moieties is much faster than the labeling of the UDP component.
